# Supplementary material for: Snow Water Equivalent Retrieval Over Idaho, Part A: Using Sentinel-1 Repeat-Pass Interferometry
Source: Copernicus journal article supplement (doi:10.5194/tc-2023-95), 2023-07-03

Gunneriussen (2001) ( $\cos\theta - \sqrt{\varepsilon(\rho) - \sin^2(\theta)}$ ) and approximations divided by snow density  $\rho$

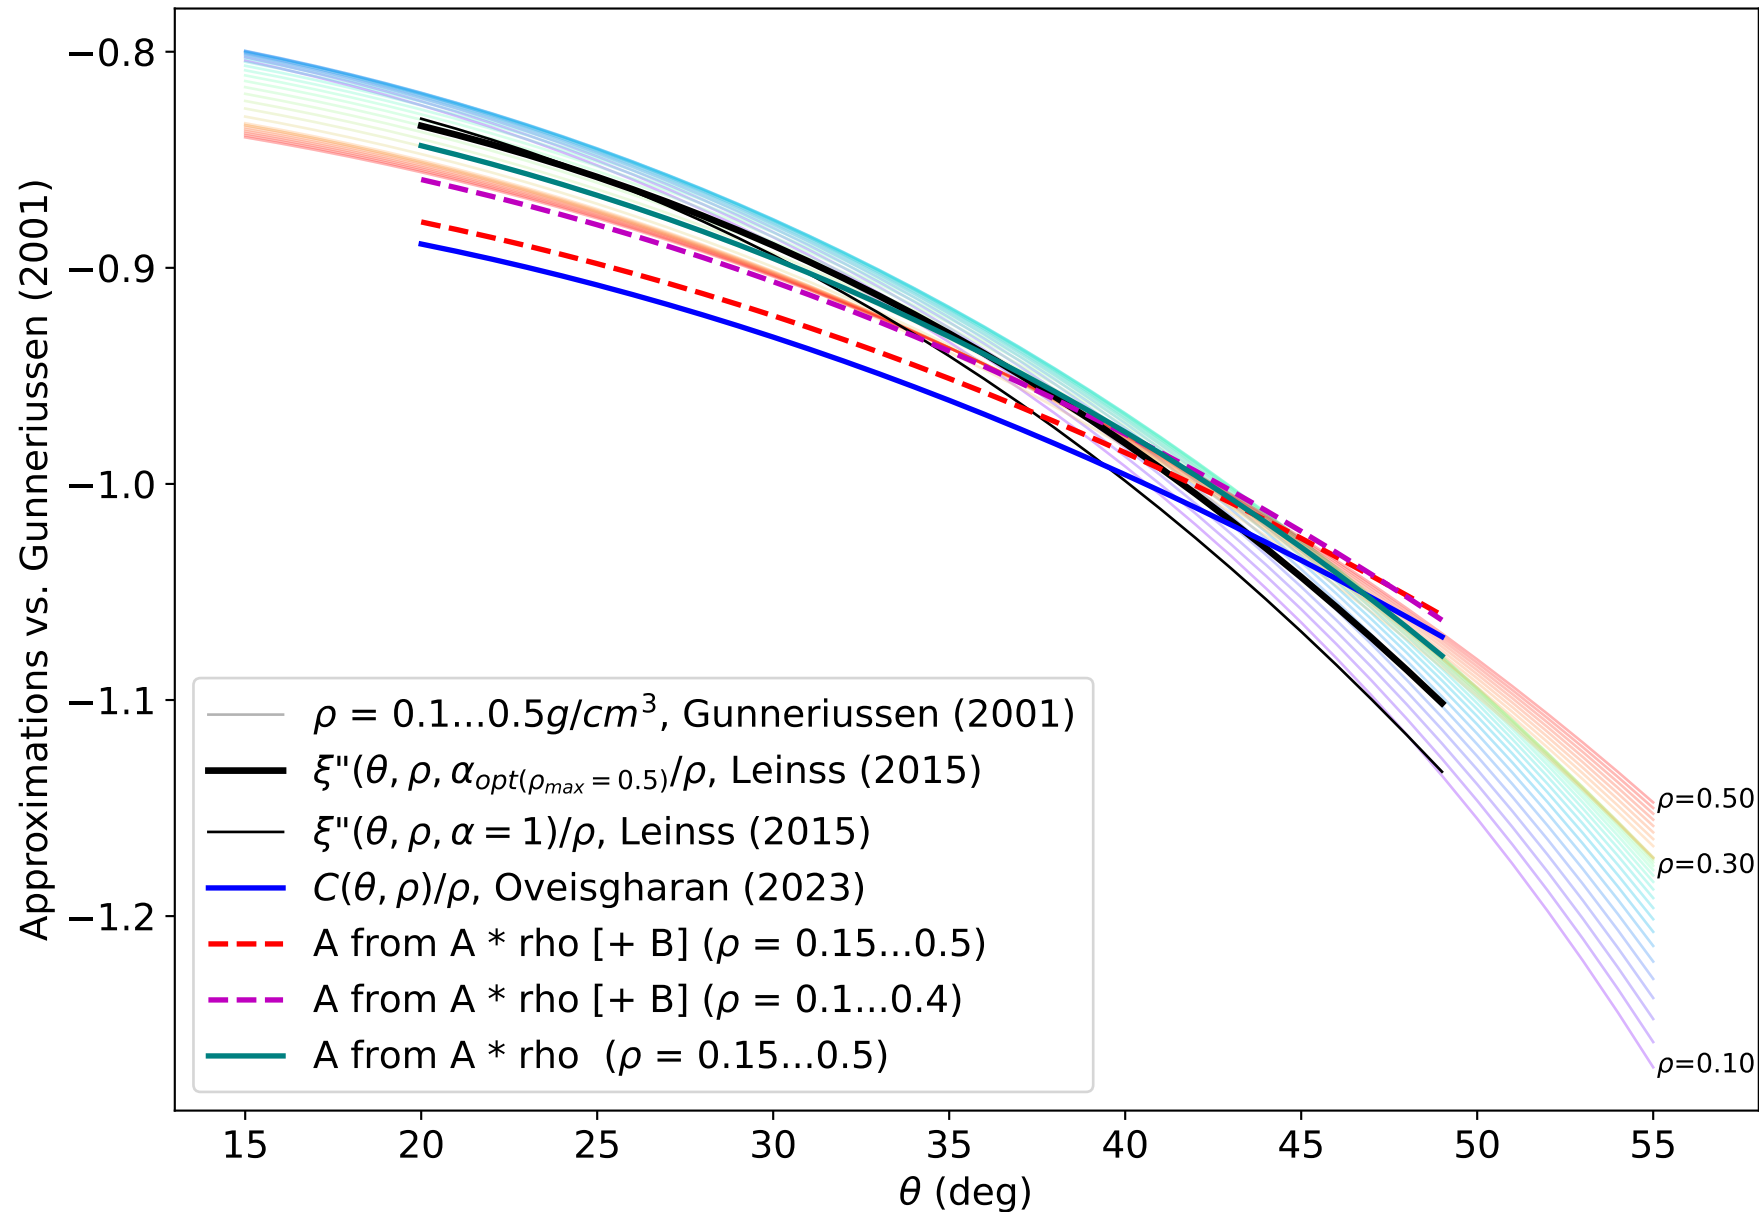

Supplement: Supplementary file [file tc-2023-95-RC1-supplement.pdf]
